# Soybean Haplotype Map (GmHapMap): A Universal Resource for Soybean Translational and Functional Genomics

Davoud Torkamaneh<sup>1,2,3</sup>, Jérôme Laroche<sup>2</sup>, Babu Valliyodan<sup>4</sup>, Louise O'Donoghue<sup>5</sup>, Elroy Cober<sup>6</sup>, Istvan Rajcan<sup>3</sup>, Ricardo Vilela Abdelnoor<sup>7,8</sup>, Avinash Sreedasyam<sup>9</sup>, Jeremy Schmutz<sup>9,10</sup>, Henry T. Nguyen<sup>4</sup>, François Belzile<sup>1,2\*</sup>

<sup>1</sup>Département de Phytologie, Université Laval, Québec City, QC, Canada

<sup>2</sup>Institut de Biologie Intégrative et des Systèmes (IBIS), Université Laval, Québec City, QC, Canada

<sup>3</sup>Department of Plant Agriculture, University of Guelph, Guelph, ON, Canada

<sup>4</sup>National Center for Soybean Biotechnology and Division of Plant Sciences, University of Missouri, Columbia, MO, USA

<sup>5</sup>CÉROM, Centre de recherche sur les grains inc., Saint-Mathieu de Beloeil, QC, Canada

<sup>6</sup>Agriculture and Agri-Food Canada, Ottawa, ON, Canada

<sup>7</sup>Brazilian Corporation of Agricultural Research (Embrapa Soja), Carlos João Strass road, Warta County, PR Brazil

<sup>8</sup>Londrina State University (UEL), Londrina, PR, Brazil

<sup>9</sup>HudsonAlpha, Institute for Biotechnology, Huntsville, AL, USA

<sup>10</sup>Department of Energy, Joint Genome Institute, Walnut Creek, CA, USA

## 1 **Abstract**

2 Here we describe the first worldwide haplotype map for soybean (GmHapMap) constructed using  
3 whole-genome sequence data for 1,007 *Glycine max* accessions and yielding 15 million variants.  
4 The number of unique haplotypes plateaued within this collection (4.3 million tag SNPs)  
5 suggesting extensive coverage of diversity within the cultivated germplasm. We imputed  
6 GmHapMap variants onto 21,618 previously genotyped (50K array/210K GBS) accessions with  
7 up to 96% success for common alleles. A GWAS performed with imputed data enabled us to  
8 identify a causal SNP residing in the *NPCI* gene and to demonstrate its role in controlling seed  
9 oil content. We identified 405,101 haplotypes for the 55,589 genes and show that such haplotypes  
10 can help define alleles. Finally, we predicted 18,031 putative loss-of-function (LOF) mutations in  
11 10,662 genes and illustrate how such a resource can be used to explore gene function. The  
12 GmHapMap provides a unique worldwide resource for soybean genomics and breeding.

13

14

15

16

17

18

19

## 1 **Introduction**

2 Soybean (*Glycine max* [L.] Merr.) is a unique crop with substantial economic value. It is the  
3 largest plant source of both animal feed protein and edible oil. It also plays a key role in  
4 sustainable agriculture as it fixes atmospheric nitrogen with the help of microorganisms  
5 (Hymowitz 1970). Diverse evolutionary processes and forces (including cycles of polyploidization  
6 and subsequent diploidization), along with domestication and modern breeding have shaped the  
7 soybean genome (Schmutz et al. 2010). The detection of the molecular footprints of these processes  
8 is essential for understanding how genetic diversity is generated and maintained and for identifying  
9 allelic variants responsible for phenotypic variation (Torkamaneh et al. 2018).

10 The global production of soybean has increased substantially in recent years (**Supplementary**  
11 **Figure 1**), but the rate of annual yield gains has lagged behind that of maize (FAOSTAT  
12 Database). In addition, with increased fluctuations in climatic conditions, next-generation soybean  
13 cultivars must not only be higher yielding but also more resilient to multiple abiotic and biotic  
14 stresses (Djanaguiraman et al. 2018). In the main soybean-growing areas of the world, soybean is  
15 an introduced crop and the foundational germplasm was very limited in its genetic diversity (Hyten  
16 et al. 2006; Maldonado dos Santos 2016). Continued genetic improvement in soybeans will require  
17 a better understanding of the genetic and especially allelic diversity within worldwide resources  
18 (Qiu et al. 2013).

19 Here we present the first haplotype map for soybean (GmHapMap) assembled from DNA  
20 resequencing data for a collection of 1,007 worldwide *G. max* accessions. We explore the use  
21 of this GmHapMap for (i) imputation of untyped variants to create high density genotype data  
22 required for gene-level resolution of genomewide association studies (GWAS); (ii) construction  
23 of gene-centric haplotypes (GCHs) for the entire set of soybean genes; and (iii) identification

1 of 11K knock-out genes due to loss-of-function (LOF) mutations. The GmHapMap provides a  
2 unique resource for translational and functional genomics for the worldwide soybean community.

3

## 4 **Results**

### 5 **Development of GmHapMap**

#### 6 **Genomic variation**

7 To establish a first worldwide haplotype map for soybean (GmHapMap), a total of 1,007  
8 resequenced soybean accessions, representative of the worldwide cultivated germplasm, were used  
9 (**Figure 1A**). These accessions span thirteen maturity groups (MGs) (000-X) based on their  
10 latitudinal adaptation. This collection includes 727 previously resequenced accessions, as well as  
11 280 accessions sequenced as part of this study which were selected to achieve a more complete  
12 coverage of soybean worldwide diversity. Genome sequencing, analyses, and accession  
13 information for GmHapMap accessions are summarized in a **Supplementary Note** and  
14 **Supplementary data 1**.

15 In total, 165 billion paired-end reads (100-150 bp; total of 19.2 trillion bp) provided an average  
16 depth of coverage of more than 15× and these were analyzed using a single pipeline (Fast-WGS)  
17 to ensure uniform variant calling. After mapping against the soybean reference genome (cv.  
18 Williams 82 va2.v1) (Schmutz et al. 2010), we identified 14,872,592 nucleotide variants (**Table**  
19 **1**), including 13M single- and multiple-nucleotide variants (SNVs and MNVs) and 2M small  
20 insertions/deletions (InDels) (-50 bp to +32 bp). Approximately 45% of these were rare (minor  
21 allele frequency (MAF) < 5%) (**Supplementary Figure 2**). Coding regions represent ~6% of the  
22 soybean genome, but only ~2.3% of the total nucleotide variants were present in these regions

1 (Table 1) with an average non-synonymous/synonymous ratio of 1.49. Nucleotide variants were  
 2 2-fold more abundant in coding regions compared to InDels, however InDels were overrepresented  
 3 in the regulatory regions. Missing data comprised less than 8% of the data, and these were  
 4 subsequently imputed with high accuracy ( $r^2 = 99.7\%$ ). Using independent genotyping data (SNP  
 5 array and dbSNP database), we estimated the false-positive rates of nucleotide variants to be  
 6 ~0.03%. This constitutes an extensive and highly accurate set of foundational data for a soybean  
 7 haplotype map.

8  
 9 **Table 1.** Type, number and location of nucleotide variants in GmHapMap.

| Statistics   |                   | Location (%) |            |            |              |                 |             |
|--------------|-------------------|--------------|------------|------------|--------------|-----------------|-------------|
| Types        | Count             | CDS*         | Intron     | UTR†       | Splice sites | Up/Down stream‡ | Intergenic  |
| SNV          | 12,197,920        | 2.5          | 8.5        | 1.6        | 0.2          | 44.8            | 42.4        |
| MNV          | 801,373           | 2.3          | 6.9        | 1.0        | 0.1          | 44.6            | 45.1        |
| INS          | 887,485           | 0.9          | 10.2       | 2.7        | 0.2          | 54.3            | 31.6        |
| DEL          | 985,814           | 1.0          | 10.1       | 2.3        | 0.3          | 53.0            | 33.2        |
| <b>Total</b> | <b>14,872,592</b> | <b>2.8</b>   | <b>8.6</b> | <b>1.7</b> | <b>0.2</b>   | <b>45.9</b>     | <b>41.7</b> |

10 \*Coding DNA sequence; †Untranslated region; ‡ 5 kb before or after a gene

11

## 12 **Extensiveness of GmHapMap**

13 The extensiveness of the GmHapMap was measured based on nucleotide diversity and haplotype  
 14 diversity. Previously, the SoySNP50K array has been used to genotype the entire USDA soybean  
 15 germplasm collection (20,087 accessions of *G. max* and *G. soja*) (Song et al. 2013). We found that  
 16 GmHapMap includes nearly all polymorphisms (99.4%) with a MAF > 1%, as well as ~89% of  
 17 rare SNPs (MAF < 1%) documented within these *G. max* accessions. Haplotype diversity

1 (pairwise LD using both  $r^2$  and  $D'$ ) was calculated for sequence variants and the average distance  
2 over which LD decayed to 0.2 was ~138 kb (**Supplementary Figure 3**). We identified 4.3 million  
3 haplotype-based tag SNPs and, to determine if a good level of saturation of both variants and  
4 haplotypes had been achieved, we randomly selected subsets of samples of increasing size ( $N=100$ ,  
5 200, ..., and 1,007). As illustrated in **Figure 1B**, the number of variants discovered did not increase  
6 significantly beyond ~750 accessions, while the number of haplotypes reached a plateau much  
7 faster (within the first ~500-600 accessions). Together, these results suggest that the GmHapMap  
8 dataset offers an exhaustive characterization of the variants and haplotypes present in soybean  
9 germplasm.

10

## 11 **Genetic diversity and artificial selection**

12 Bayesian clustering (STRUCTURE) of GmHapMap accessions using whole-genome SNP data  
13 revealed 12 subpopulations (**Supplementary Note & Supplementary Figure 4**). We explored the  
14 phylogenetic relationships among GmHapMap accessions by constructing an un-rooted neighbor-  
15 joining tree. As can be seen in **Figure 1C**, the grouping of accessions reflected geographic origin  
16 with some admixture (**Figure 1C and Supplementary Figure 5**). Genomewide genetic diversity  
17 ( $\theta_\pi$ ) analysis showed a consistent level of genetic diversity (mean of  $\theta_\pi = 1.36 \times 10^{-3}$ , ranging  
18 between  $1.19 \times 10^{-3}$  to  $1.72 \times 10^{-3}$ ) in different soybean populations (**Figure 1A**). Nucleotide  
19 diversity was plotted for the 20 chromosomes and found to be highest in the terminal regions of  
20 chromosomes (**Supplementary Figure 6**). Extensive peri-centromeric regions were very low in  
21 genetic diversity but chromosomes Chr13 and Chr17 maintained higher diversity across these  
22 regions. Genic regions showed even lower levels of diversity (mean  $\theta_\pi = 7.1 \times 10^{-4}$ ) and  
23 exceptionally low diversity was seen within 527 genomic regions (including 540 genes; mean  $\theta_\pi$

1 =  $4.6 \times 10^{-6}$ ) that are presumably selection hotspots (**Supplementary Note, Supplementary data**  
 2 **2 and Supplementary Figure 7**).

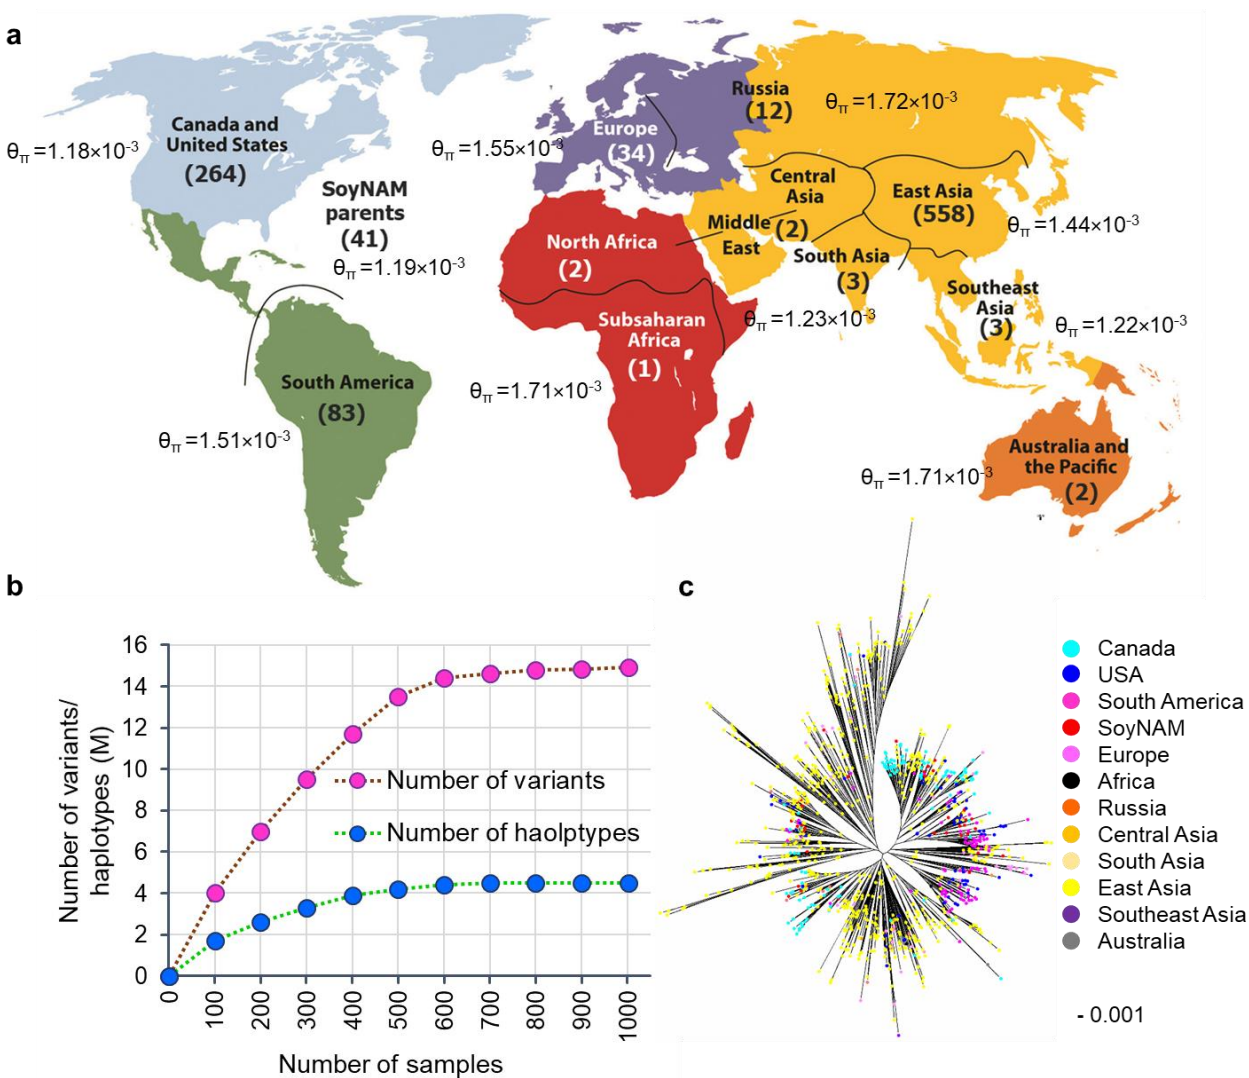

3  
 4 **Figure 1.** Description of GmHapMap. (a) Geographical distribution and related genetic diversity  
 5 value ( $\theta_{\pi}$ ) of GmHapMap accessions. (b) Number of variants (pink) and haplotypes (blue) based  
 6 on different number of accessions. (c) Un-rooted phylogenetic tree of all accessions inferred from  
 7 whole-genome SNPs representing existing genetic diversity and admixture among GmHapMap  
 8 accessions.

## 1 **Phasing, identity-by-descent, and large-scale imputation of untyped variants**

2 The GmHapMap dataset captures substantial amounts of identity-by-descent (IBD) allele sharing  
3 which allows a rule-based approach to long-range phasing that yields very accurate haplotypes.  
4 Using long-range phasing, we found 95 blocks of IBD larger than 1 Mb in size (**Supplementary**  
5 **data 3**). The determination of haplotype phase is important because of its applications such as the  
6 imputation of untyped variants. Imputation of untyped variants greatly boosts variant density,  
7 allowing fine-mapping studies of GWAS loci and large-scale meta-analysis. We created two  
8 reference panels: REF-I comprising all SNPs and REF-II containing 1.9M haplotype-based tag  
9 SNPs that reside in genic regions. Three lower density genotype datasets, SoySNP50K (20,087  
10 accessions genotyped with 43K SNPs), genotyping-by-sequencing (GBS; 1,531 accessions  
11 genotyped with 210K SNPs), and combined GBS/SoySNP50K (1,531 accessions genotyped with  
12 250K SNPs) were used for untyped variant imputation with each of the two reference panels. In  
13 all but one case, the accuracy (squared correlation ( $R^2$ ) between imputed and known genotypes,  
14 see M&M for details) ranged between 92% and 96% for common variants (allele frequency (AF)  
15  $> 0.2$ ) in each dataset, while decreasing gradually with allele frequency (**Figure 2A**). In the case  
16 of the SoySNP50K dataset using REF-I, the accuracy of imputed untyped variants was  
17 significantly lower (80-85% for common alleles). Given the observed variation in the accuracy of  
18 imputation using different reference panels and datasets, we investigated the causes of erroneous  
19 inferred calls. Several characteristics were tied to inaccurately imputed SNPs: these were  
20 commonly rare variants (low AF), located in recombination hot spots, in short LD blocks or in  
21 genomic regions with structural variants. Furthermore, the initial marker density in the  
22 experimentally-derived dataset had a large impact on imputation accuracy. GBS and SNP array  
23 datasets are two highly complementary marker datasets because most (~90%) of the SoySNP50K



1 markers are present in genic regions, while most of the GBS markers (~60%) are present in  
2 intergenic regions (**Supplementary Figure 8 & 9**). Therefore, combining GBS and SoySNP50K  
3 datasets (**Supplementary Note**) increases the density and uniformity of distribution of SNPs  
4 across the genome. The joint use of such commonly available SNP data increased the level of  
5 accuracy of imputation of untyped variants (**Figure 2A**).

6 To demonstrate the benefits of untyped-variant imputation on GWAS analysis, the imputation was  
7 performed on a 1Mb-region harbouring a QTL previously identified for seed oil content on  
8 chromosome 14. We used the REF-II panel to perform imputation on an initial dataset of 64K  
9 GBS-derived SNPs (genomewide) among 139 soybean lines that had been characterized for their  
10 seed oil content (Sonah et al. 2015). Using this enhanced SNP catalog and a multi-locus mixed-  
11 model implementation, a very strong association ( $p$ -value =  $4.2 \times 10^{-14}$  and  $q$ -value < 0.001) with a  
12 SNP residing in the *NPC1* (Niemann-Pick C1) gene (*Glyma.14g001500*) (**Figure 2B**) was  
13 detected. An Arabidopsis mutant of this gene (*npc1*) exhibits a 58% higher fatty acid content  
14 (Feldman et al. 2015) making this gene a likely candidate contributing to total oil content in  
15 soybean. This demonstrates that the increased number of informative SNP loci, obtained through  
16 the imputation of untyped variants, can prove highly beneficial in studying the genetic architecture  
17 of complex agronomic traits in soybean.

18

19

20

21

22

1

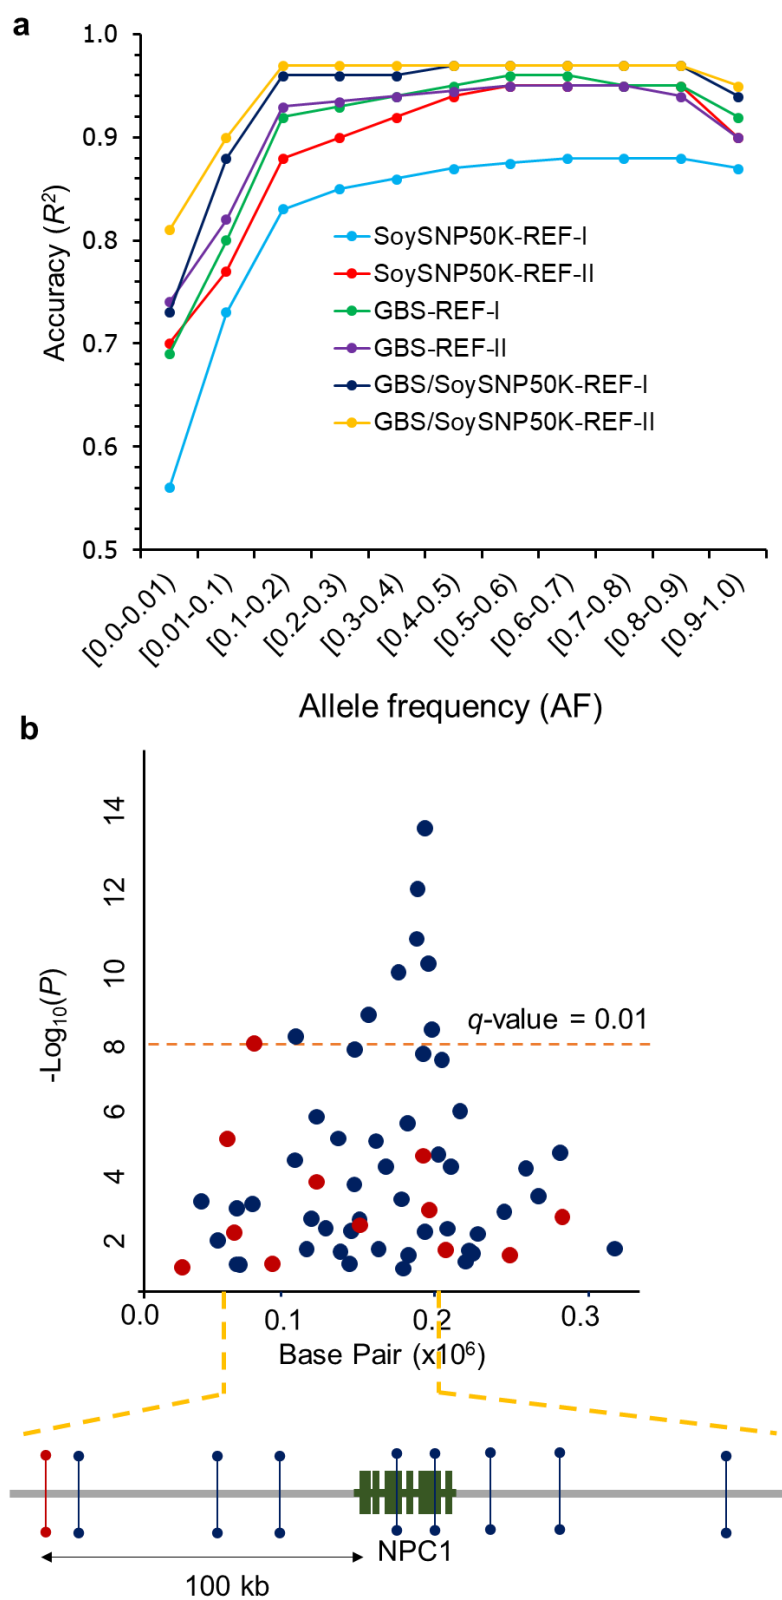

1 **Figure 2.** (a) Imputation accuracy as a function of allele frequency for 6 different scenarios; three  
2 different experimentally derived genotype datasets (SoySNP50K, GBS, and GBS/SoySNP50K)  
3 and two reference panels (REF-I and REF-II). (b) Top, association analysis for seed oil content on  
4 chromosome 14. Blue dots represent imputed variants whereas red dots identify the original GBS-  
5 derived variants. *NPCI* (Niemann-Pick C1) is an orthologue of an Arabidopsis gene known to play  
6 a key role in fatty acid synthesis. Bottom, schematic representation of strongly associated variants  
7 in the vicinity of the *NPCI*. The nearest significantly associated GBS-derived variant (red line) is  
8 located 100 kb upstream and exhibits a relatively low degree of LD ( $r^2 = 0.5$ ).

9  
10

## 11 **Gene-centric haplotypes: a resource for translational genomics**

12 HaplotypeMiner (Tardivel et al. unpublished) and the GmHapMap SNP dataset were used to  
13 identify 405,101 gene-centric haplotypes (GCHs) for 52,823 genes (94.5% of all soybean genes  
14 (55,589)). As can be seen in **Figure 3A**, the number of GCHs per gene ranged between 2 and 43,  
15 while averaging  $\sim 7$  (**Supplementary Figure 10, and Supplementary data 4**). GCHs could not  
16 be determined (ND) for 2,766 genes with the set of parameters used here. In total, 11,407 genes  
17 had more than 10 GCHs with 71% (8,082 genes) of these harboring 11-15 GCHs. Such genes were  
18 typically located in very short LD blocks with a high degree of nucleotide diversity (mean  $\theta_\pi = 4.5$   
19  $\times 10^{-3}$ ) (**Supplementary Figure 11**). A slight negative correlation was observed between gene  
20 length and the number of GCHs. However, we found a positive correlation between GCH counts  
21 and haplotype size (distance between two most distant SNPs defining a GCH) (**Supplementary**  
22 **Figure 12**). An example of GCHs for the *GmGla* (*Glyma.10g221500*) gene (*E2* locus controlling

1 maturity) (Watanabe et al. 2012; Tsubokura et al. 2014), an orthologue of the arabidopsis  
 2 *GIGANTEA (GI)* gene, is presented in **Figure 3B**. We found three GCHs for *GmGla*, which is  
 3 consistent with the number of alleles that have been previously reported for this gene. Knowledge  
 4 of the GCHs (and possibly alleles) in all soybean genes can greatly facilitate the establishment of  
 5 a functional link between the various alleles of a gene and the associated phenotype.

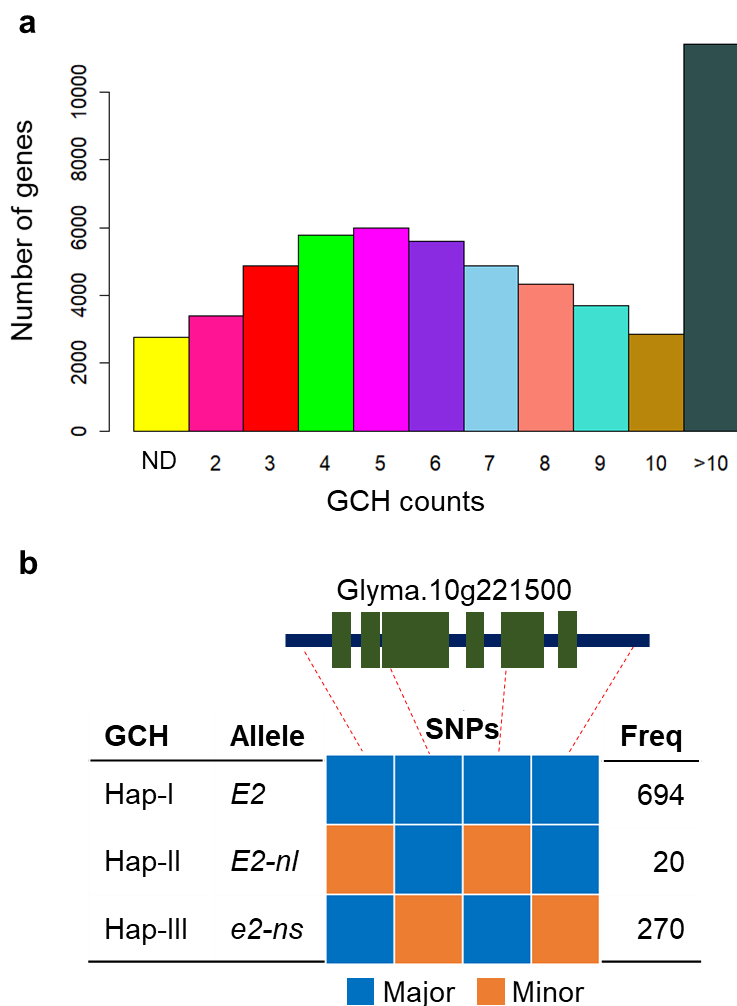

6  
 7 **Figure 3.** Description of GCHs characterized in GmHapMap dataset. (a) Distribution of number  
 8 of genes based on their predicted GCHs. (b) Schematic representation of predicted GCHs for  
 9 *GmGla*.

## 1 **LOF Mutations: a resource for functional genomics**

2 Using SnpEff, a subset of variants located inside the coding regions were predicted to have a large  
3 functional impact. Of these variants, 18,031 putative loss-of-function (LOF) mutations are  
4 predicted to severely impair protein synthesis or function through disruption of splicing,  
5 introduction of a premature stop codon, shifts in the coding frame and alterations to the start/stop  
6 codons (MacArthur et al. 2012) and these were identified in a total of 10,662 genes (19.3% of all  
7 soybean genes) (**Table 2**). These mutations are the result of 5,987 SNVs (33.2%), 279 MNVs  
8 (1.5%) and 11,765 InDels (65.3%). Frameshift-inducing variants (10,754) were the predominant  
9 category, representing 59.6% of LOF mutations and affecting 6,718 genes. InDels (ranging from  
10 -50 bp to +32 bp) were, understandably, over-represented (4-fold) in the LOF category due to their  
11 high probability of resulting in a LOF allele. Overall, most of the LOF mutations were present at  
12 low frequency, with 78% having an allele frequency below 10% (**Supplementary Figure 13**).  
13 Genes harboring LOF one or more mutations were categorized into two groups: unique and multi-  
14 copy. We reasoned that a LOF mutation in a unique gene would necessarily result in phenotypic  
15 consequences. We found that only 706 (6.6%) of genes were single-copy genes, while the  
16 remaining 9,957 (93.4%) had at least one other copy. This constitutes a significant enrichment ( $P$   
17  $< 0.001$ ) compared to the genomewide occurrence of gene duplication. LOF mutations in  
18 duplicated genes could also have functional consequences if the mutated copy was uniquely  
19 expressed as a consequence of neo- or sub-functionalization (Roulin et al. 2013). We assessed this  
20 by examining transcriptomic data from 26 tissues and found that 9,570 of the 9,957 duplicated  
21 genes (96%) exhibited a unique expression pattern (**Supplementary Note, Supplementary data**  
22 **5 & Supplementary Figure 14**). Thus, despite the fact that the vast majority of LOF mutations  
23 occur in genes for which there is more than one copy, a large proportion of these genes exhibit

1 unique expression patterns, thus making it possible that a LOF will result in a detectable  
2 phenotype.

3

4 **Table 2.** Number of loss-of-function variants by sequence ontology (SO).

| SO term                                                | SNV          | MNV        | INS          | DEL          | Total variants | Genes         |
|--------------------------------------------------------|--------------|------------|--------------|--------------|----------------|---------------|
| <b>Splice site-disrupting (donor)</b>                  | 1,270        | 38         | 247          | 205          | 1,760          | 1,640         |
| <b>Splice site-disrupting (acceptor)</b>               | 1,546        | 52         | 207          | 146          | 1,951          | 1,803         |
| <b>Stop codon-introducing</b>                          | 2,826        | 149        | 100          | 7            | 3,082          | 2,418         |
| <b>Frameshift-inducing</b>                             | 0            | 0          | 4,158        | 6,596        | 10,754         | 6,718         |
| <b>Start/Stop codon-disrupting</b>                     | 345          | 40         | 54           | 45           | 484            | 452           |
| <b>Total</b>                                           | <b>5,987</b> | <b>279</b> | <b>4,766</b> | <b>6,999</b> | <b>18,031</b>  | <b>13,031</b> |
| <b>Total number of genes affected by LOF variants*</b> |              |            |              |              |                | <b>10,662</b> |

5 \* Some of the genes were affected with more than one LOF mutation, therefore the total number  
6 of genes is lower than the sum of the all genes.

7

8 To assess the quality of this catalogue of mutations, we first inspected it for genes already known  
9 (i.e. functionally validated) to harbor an LOF mutation. This is indeed the case, all known genes  
10 in the literature were found within the catalogue (**Supplementary data 6**). Then we investigated  
11 and confirmed the phenotypic impact of some of these LOF mutations in GmHapMap accessions  
12 (**Figure 4**). A frameshift mutation (frequency=0.003) in the microsomal omega-3 fatty acid  
13 desaturase (*FAD3A*), a key gene for linolenic acid synthesis in soybean seeds (Reinprecht & Pauls  
14 2016), was found in three accessions. Near-infrared spectroscopy (NIRS) analysis of four soybean  
15 lines (two with and without this LOF mutation) showed a significant ( $P < 0.01$ ) decrease in  
16 linolenic acid content in the mutant lines (4%) compared to the wild type (10%) (**Figure 4A**). A  
17 mutation (f=0.005) in *Glyma.04G050200*, the gene underlying the J locus controlling the Long  
18 Juvenile trait (Lu et al. 2017), resulted in a significant difference ( $P < 0.01$ ) in grain weight per

1 plant (8g in the mutant compared to 25g in the wild type) (**Figure 4B**). The introduction of a  
2 premature stop codon ( $f=0.02$ ) due to a SNV in *GmGla/E2* (Watanabe et al. 2012) significantly ( $P$   
3  $< 0.01$ ) reduced the number of days from emergence to the appearance of the first open flower  
4 (DAE) (from 125 in wild-type lines to 95 in the mutant) (**Figure 4C**). Finally, a SNV ( $f=0.009$ )  
5 resulted in the disruption of splicing in the gene coding for the 3-ketoacyl-ACP synthase II (KASII)  
6 enzyme, a key gene in the oil biosynthesis pathway (Goettel et al. 2016). NIRS analysis of palmitic  
7 acid levels showed a significant ( $P < 0.05$ ) decrease in the mutant lines (9%) compared to the wild  
8 type (12%) (**Figure 4D**). The development of a catalogue of LOF mutations represents a valuable  
9 resource for functional genomics.

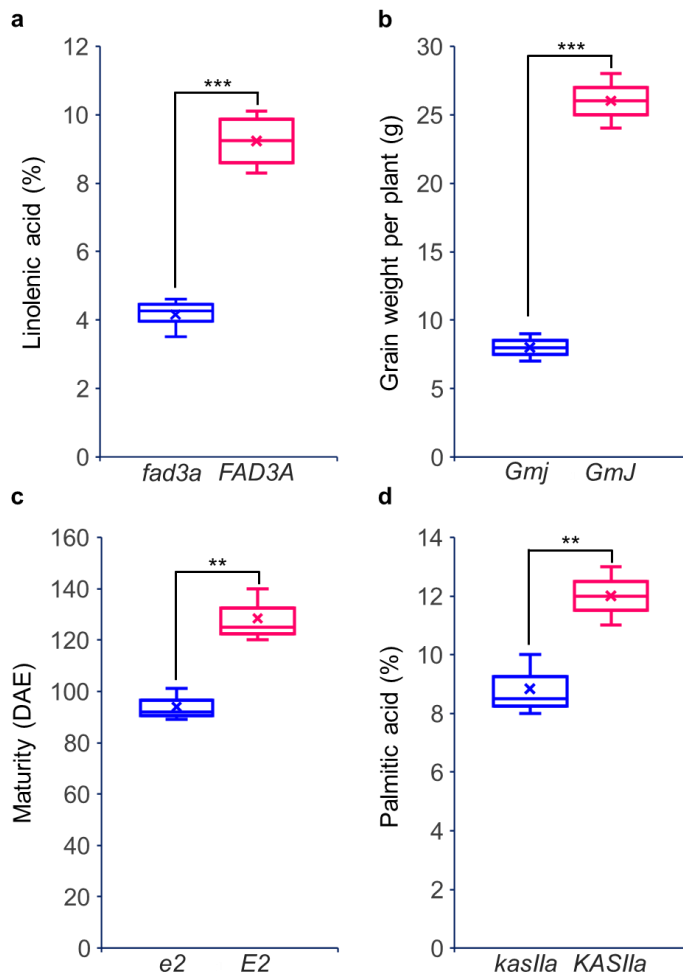

1 **Figure 4.** Phenotypic variation observed between accessions with (blue) and without (red) a  
2 predicted LOF mutation in four different genes. **(a)** *FAD3A*, a key gene for linolenic acid synthesis;  
3 **(b)** *GmJ*, a key gene of Long Juvenile trait; **(c)** *GmGla*, a key gene controlling maturity; **(d)**,  
4 *KASIIa*, a key gene in the oil biosynthesis pathway.

5

6

## 7 **Discussion**

8 Using whole-genome sequencing data from a large collection of 1,007 soybean accessions, we  
9 developed the first haplotype map of soybean (GmHapMap), a valuable resource for soybean  
10 genetic studies and breeding. A first challenge was to create a uniform and accurate catalogue of  
11 nucleotide variation using a common version of the reference genome and a single bioinformatics  
12 pipeline (Lek et al. 2016). The GmHapMap produced here is not only uniform but also it achieved  
13 higher levels of genotype accuracy (>98%) compared to previous studies (92-97%) (Hwang et al.  
14 2015). To create a representative haplotype map, a good level of saturation of both variants and  
15 haplotypes is required. Close to 15M sequence variants (SNVs, MNVs, and Indels) were called  
16 that captured nearly all polymorphisms with MAF > 1% in the USDA *G. max* germplasm  
17 collection (Song et al. 2013). The number of sequence variants did not increase significantly  
18 beyond the first 600 accessions, suggesting that a collection of this size has succeeded in capturing  
19 a sizeable fraction of worldwide nucleotide variation within cultivated soybean. Similarly, the  
20 number of unique haplotypes (4.3M tag SNPs) also plateaued relatively early within this collection  
21 of soybean germplasm. Together, these data suggest that the 15M variants captured in GmHapMap  
22 are both highly accurate and comprehensive of the genetic diversity within cultivated soybean at  
23 a worldwide level.



1 GmHapMap brings more resolution to the within-species diversity of *G. max*. A lower level of  
2 genomewide genetic diversity was observed here in soybean (mean  $\theta_{\pi} = 1.36 \times 10^{-3}$ ) compared to  
3 other major crops such as rice ( $\theta_{\pi} = 2.29 \times 10^{-3}$ ) (Caicedo et al. 2007) and corn ( $\theta_{\pi} = 6.6 \times 10^{-3}$ ) (  
4 Gore et al. 2009). It is presumed that several genetic bottlenecks, as well as strong selection  
5 pressure have reduced genetic diversity in soybean (Hyten et al. 2006). In addition, modern  
6 soybean breeding is founded on a very limited number of the founder accessions (Hymowitz et al.  
7 1983). We also noticed an average Nonsyn/Syn ratio of 1.49, which is higher than that reported in  
8 other plants (sorghum (1.0), rice (1.2) and Arabidopsis (0.83) (Clark et al. 2007; McNally et al.  
9 2009; Wang et al. 2015)). The greater accumulation of deleterious mutations in the soybean  
10 genome could be attributed to (1) a reduced effective population size (Makino et al. 2018); (2) a  
11 higher level of LD and the resulting ‘hitchhiking’ effect (Stephan et al. 2008); and (3) the  
12 domestication-associated Hill-Robertson effect (Lu et al. 2006).

13 The GmHapMap was used as a reference panel and more than 21K accessions that had been  
14 previously genotyped using common approaches (SNP array and/or GBS) and obtained an  
15 imputation accuracy of 92-96% for common variants and ~80% for rare variants. The accuracy  
16 levels, obtained here, are comparable to the 98% reported by Bukowski et al. (2018) in maize  
17 (Bukowski et al. 2018). The success of untyped-genotype imputation depends critically on how  
18 well a reference panel has captured the relevant haplotype diversity, as well as the marker density  
19 of the experimental dataset (Browning & Browning 2016). Here we document that GmHapMap  
20 provides an extensive capture of SNP and haplotype diversity within cultivated soybeans  
21 worldwide. It is likely that the lower imputation accuracy observed for the SNP array dataset can  
22 be attributed to the relatively low marker density of this dataset.

1 Enhanced datasets resulting from large-scale imputation can improve the efficacy of GWAS  
2 analysis (Hao et al. 2009; Marchini & Howie 2010). To illustrate the benefits of the GmHapMap  
3 resource for GWAS, we performed an association analysis on soybean seed oil content using  
4 imputed SNPs. A strong association with an imputed SNP residing in the *NPCI* gene was detected  
5 and its orthologue in *Arabidopsis* is known to contribute to seed oil content (Feldman et al. 2015).  
6 Several studies in human (Li et al. 2009), cattle (Santana et al. 2014), pig (Yan et al. 2017), maize  
7 (Yang et al. 2014) and rice (Wang et al. 2018) have demonstrated the capacity of imputation to  
8 improve the power of GWAS analysis. In the coming years, we expect that soybean researchers  
9 will deploy GmHapMap for imputation and more precise dissection of the genetic basis of complex  
10 traits in soybean.

11 This is the first time that a comprehensive description of GCHs, for the complete set of genes  
12 (55,589), has been achieved for a species. This catalogue of GCHs was obtained using  
13 HaplotypeMiner (Tardivel et al. unpublished). Tardivel et al. reported that HaplotypeMiner  
14 allowed the identification of SNP haplotypes for which 97.3% of lines sharing a same haplotype  
15 were correctly identified as having the same allele (Tardivel et al. unpublished). It has been well  
16 documented that haplotypes are more informative than single biallelic SNPs (Stephens et al. 2001).  
17 Knowledge of the GCHs (and possibly alleles) can greatly facilitate the establishment of a  
18 functional link between the various alleles of a gene and the associated phenotype. Haplotype-  
19 phenotype association revealed the functional alleles of several genes in wheat (Jiang et al. 2015),  
20 maize (Yang et al. 2013), rice (Si et al. 2016) and soybean (Langewisch et al. 2014). Knowledge  
21 of the alleles present at one or many genes can be tremendously important to breeders. Epistatic  
22 interactions between specific alleles as well as the effects of alleles at neighboring loci (carried

1 along via linkage drag) can be very important when considering which combinations of alleles will  
2 be most desirable to achieve a given phenotype.

3 A final aspect of this work is that the identification of LOF mutations in soybean protein-coding  
4 genes. GmHapMap includes a set of nearly 11K knocked-out genes. We recognized that this  
5 catalogue of knocked-out genes is highly advantageous for soybean functional genomics for  
6 investigation of gene function, and application as genetic makers in soybean breeding programs.

7 The next challenge will be to link genetic variation, GCHs, and LOFs derived from GmHapMap  
8 with agronomic traits. This will need an extensive effort to measure phenotypes under multiple  
9 field and laboratory conditions. We believe that GmHapMap will lead and accelerate the soybean  
10 breeding efforts and future sustainable agriculture.

11

12

13

14

15

16

17

18

19

20

21

## 1 **Methods**

### 2 **GmHapMap sequencing data**

3 Two collections of soybeans were used: a first set of 727 accessions for which whole-genome  
4 sequencing had been previously released (Zhou et al. 2015; Maldonado dos Santos et al. 2016;  
5 Valliyodan et al.2016; Fang et al. 2017; Song et al. 2017; Torkamaneh et al. 2017) and a second  
6 set of 280 accession which were sequenced in this study. These were chosen to provide a more  
7 balanced representation of various soybean growing areas in the world. Seeds were planted in  
8 individual two-inch pots containing a single Jiffy peat pellet (G rard Bourbeau & fils inc. Quebec,  
9 Canada). First trifoliolate leaves from 12-day-old plants were harvested and immediately frozen in  
10 liquid nitrogen. Frozen leaf tissue was ground using a Qiagen TissueLyser. DNA was extracted  
11 from approximately 100 mg of ground tissue using the Qiagen Plant DNeasy Mini Kit according  
12 to the manufacturer’s protocol. DNA was quantified on a NanoDrop spectrophotometer. Illumina  
13 Paired-End libraries were constructed for 280 accessions using the KAPA Hyper Prep Kit (Kapa  
14 Biosystems, Wilmington, Massachusetts, USA) following the manufacturer’s instructions  
15 (KR0961 – v5.16). Samples were sequenced on an Illumina HiSeq X10 platform at the McGill  
16 University-G nome Qu bec Innovation Center in Montreal, QC, Canada.

17

### 18 **Nucleotide variants identification**

19 Sequencing reads from all 1,007 accessions were processed using the same analytical  
20 bioinformatics pipeline (Fast-WGS) (Torkamaneh et al. 2017) to create a uniform catalogue of  
21 genetic variants. In brief, the 100-150-bp paired-end reads were mapped against the *G. max*  
22 reference genome [Gmax\_275 (Wm82.a2)] (Schmutz et al. 2010). Then we removed variants if:

1 1) they had more than two alleles, 2) an allele was not supported by reads on both strands, 3) the  
2 overall quality (QUAL) score was <32, 4) the mapping quality (MQ) score was <30, 5) read depth  
3 (minNR) was <2 and 6) the minor allele frequency (MinMAF) was <0.0009.

4

## 5 [Determining the accuracy of nucleotide variants](#)

6 The SoySNP50K iSelect BeadChip has been used to genotype the entire USDA soybean  
7 germplasm collection (Song et al. 2013). The complete dataset for 20,087 *G. max* and *G. soja*  
8 accessions genotyped with 42,508 SNPs was downloaded from Soybase (Grant et al. 2010). Of  
9 these accessions, we randomly selected 50 accessions which were in common with the  
10 GmHapMap collection. For these 50 accessions, we extracted their genotype calls at all SNP loci  
11 for which data were available. This large set of SoySNP50K genotype calls (2,125,400 genotypes  
12 or data points) was directly compared with the WGS-derived SNP calls (obtained using the Fast-  
13 WGS pipeline) to assess genotype accuracy.

14

## 15 [Determining the effects of nucleotide variants](#)

16 The functional impact of nucleotide variants was performed using the soybean genome using  
17 SnpEff and SnpSift (Cingolani et al. 2012). Based on the genome annotation, nucleotide variants  
18 were categorized on the basis of their location (exonic, intronic, splice sites, UTR (3 & 5 prime),  
19 upstream and downstream regions (within 5kb of a gene), and intergenic) and their predicted  
20 functional impact (missense, nonsense, and silent). To determine LOF mutation, a database was  
21 built using 55K soybean protein-coding genes (Gmax\_275\_Wm82.a2.v1.gene.gff3, from  
22 Phytozome on Jan. 2016) for SnpEff. The LOF variants were extracted from the SnpEff-annotated

1 VCF file using *grep* command lines. Variants were mapped on to transcripts annotated as  
2 “protein\_coding” and containing an annotated “START” codon, and then classified as  
3 synonymous, missense, nonsense (stop codon-introducing, start/stop codon-disrupting or splice  
4 site-disrupting (canonical splice sites)). In this work, we excluded transcripts labelled as NMD  
5 (predicted to be subject to nonsense-mediated mRNA decay). We also applied another filtering  
6 step, based on annotation, to identify high-confidence knocked-out genes. The genes with LOF  
7 mutations were removed if (i) the ‘REF’ field in the input VCF file did not match the reference  
8 genome, (ii) they had an incomplete transcript, or (iii) they did not have a proper START codon.

9

## 10 Population structure and genetic diversity

### 11 Structure

12 Population structure was estimated using a variational Bayesian inference implemented in  
13 fastSTRUCTURE (Raj et al. 2014). Five runs were performed for each number of populations (K)  
14 set from 1 to 15 using genomewide SNP data. The most likely K value was determined by the log  
15 probability of the data ( $\ln P(D)$ ) and delta K, based on the rate of change in  $\ln P(D)$  between  
16 successive K values. Similar analyses were performed separately for all 20 chromosomes of  
17 soybean.

### 18 Genetic relationship

19 The evolutionary history was inferred using the Neighbor-Joining method (Saitou & Nei 1987)  
20 (rooted and unrooted) with the 12M genomewide SNPs identified in this study. The taxa were  
21 clustered together using bootstrap test (1,000 replicates) (Felsenstein 1985). The tree was drawn  
22 to scale, with branch lengths (next to the branches) in the same units as those of the evolutionary

1 distances used to infer the phylogenetic tree. The evolutionary distances were computed using the  
2 Maximum Composite Likelihood method (Tamura et al. 2004) and the units correspond to the  
3 number of base substitutions per site. Evolutionary analyses were conducted in MEGA7 (Kumar  
4 et al. 2016).

## 5 Genetic diversity

6 We measured the nucleotide diversity ( $\pi$ ) in sliding windows of 1000 bp across the genome using  
7 VCFtools (Danecek et al. 2011). The average pairwise divergence within a subpopulation ( $\theta\pi$ ) was  
8 estimated for the whole genome among different subpopulations. Sliding windows of different  
9 sizes (1 kb, 7kb, 10 kb and 100 kb) that had a 90% overlap between adjacent windows were used  
10 to estimate  $\theta\pi$  for both whole genome and each chromosome. To display the pattern in each  
11 chromosome, a window of 100 kb was used.

12

## 13 Linkage disequilibrium and tag SNP identification

14 Genomewide pairwise linkage disequilibrium (LD) analysis ( $r^2$  and  $D'$ ) was performed using all  
15 nucleotide variants from the GmHapMap dataset. The average  $r^2$  value was calculated for each  
16 length of distance (<1000 bp), and LD decay calculated using PopLDdecay (Zhang et al. 2018).  
17 For tag SNP selection, we used PLINK (Purcell et al. 2007) to calculate LD between each pair of  
18 SNPs within a sliding window of 50 SNPs and we removed all but one SNP that were in perfect  
19 LD ( $LD = 1$ ); the remaining SNPs were deemed tag SNPs.

20

## 1 Phasing, identification of identity by descent (IBD) and imputation

2 The IBD analysis was conducted using BEAGLE v4.1 (Browning & Browning 2016). In brief, to  
3 identify IBD segments, the genotypic dataset was phased using BEAGLE with 50 iterations for  
4 each chromosome. The output of these calculations was a series of “putative” IBD segments shared  
5 between pairs of individuals. Each segment comes with the following information attached: IDs  
6 for the pair of individuals, start and end position of the IBD segment, and probability score (LOD  
7 score). We filtered these segments using LOD score and the length of IBD.

8

## 9 Imputation of untyped variants

10 We used two reference panels for untyped-variant imputation. The ‘REF-I’ panel includes 1,006  
11 accessions from GmHapMap with the entire SNP dataset, while the ‘REF-II’ panel includes 1,006  
12 accessions and only 1.9M tag SNPs from genic regions (tag SNPs in genic regions or within 2kb  
13 of a gene). These two reference panels were created for all 20 chromosomes of soybean and were  
14 phased using BEAGLE v4.1 (Browning & Browning 2016) with 100 iterations.

15 As initial lower density datasets, we used three collections of soybean accessions genotyped with  
16 commonly used genotyping tools. A first set of 20,087 accessions (the entire USDA Soybean  
17 Germplasm Collection) had been characterized using the SoySNP50K iSelect Bead Chip (Song et  
18 al. 2013) to yield a set of 43K polymorphic markers. A second set comprised 1,531 accessions  
19 which had been subjected to genotyping-by-sequencing (GBS; *ApeKI* protocol) (Sonah et al. 2013)  
20 and in which SNPs had been called using the Fast-GBS pipeline (Torkamaneh et al. 2017). Finally,  
21 a third set of 1,531 accessions (GBS set) with a combined SNP catalogue derived from GBS and  
22 SoySNP50K (**Supplementary Note**).



1 Phasing and imputation were performed using BEAGLE v4.1 (Browning & Browning 2016) for  
2 each chromosome with the following parameters: (i) nthreads = 10 (number of threads); (ii)  
3 window = 100,000 (number of markers in a sliding window); (iii) overlap = 50,000 (number of  
4 overlapping markers between adjacent windows); (iv) niterations = 100 (number of phasing  
5 iterations) and (v) err = 0.00001 (the allele miscall rate).

6

### 7 [Determining the imputation accuracy](#)

8 The WGS SNP data from 1,006 of the 1,007 resequenced accessions were used as a reference  
9 panel to impute untyped variants. The remaining line was kept out of the reference panel to  
10 determine how accurately data at untyped loci (present in the GmHapMap data but absent from  
11 the low-density genotype catalogue) could be imputed in this accession. We performed three such  
12 permutations where a single accession was kept aside to estimate imputation accuracy. For these  
13 lines purposely excluded from the reference panel, we compared the imputed genotypes against  
14 the genotypes called at these same loci following WGS.

15

### 16 [Genomewide association analysis](#)

17 Sonah et al. (2013) described a set of QTLs using GWA analysis on a subset of 139 soybean  
18 accessions. These accessions were genotyped via GBS. We imputed untyped variants on this low-  
19 density genotype dataset from GmHapMap in 1Mb of chromosome 14, encompassing a QTL for  
20 seed oil content. GWA analysis was conducted using GAPIT R package (Lipka et al. 2012) using  
21 a MLM model (Segura et al. 2012). A candidate gene was identified using SoyBase database

1 (Grant et al. 2010) and The Arabidopsis Information Resource (TAIR)  
2 [<https://www.arabidopsis.org/servlets/TairObject?type=gene&name=AT4G38350.1>]

3

#### 4 Identification of gene-centric haplotypes

5 The identification of GCHs was performed using the HaplotypeMiner R package  
6 (<https://github.com/malemay/HaplotypeMiner>) with the entire SNP dataset on 55,381 protein-  
7 coding genes in the soybean genome. In brief, the following parameters were used: (i) R2\_measure  
8 = "r2s" (the estimation of linkage disequilibrium between markers was measured based on  
9 corrected  $r^2_{vs}$  which takes into account information related to genetic relatedness and population  
10 structure); (ii) cluster\_R2 = "r2s" (LD measure to use in the clustering step); (iii)  
11 max\_missing\_threshold = 0.05 (the maximum proportion of missing genotypes allowed for a  
12 marker); (iv) max\_het\_threshold = 0.01 (the maximum proportion of heterozygous genotypes  
13 allowed for a marker); (v) min\_allele\_count = 4 (the minimum number of times the minor allele  
14 has to be seen for a marker to be retained); (vi) cluster\_threshold = 0.9 (the minimum LD beyond  
15 which markers were clustered); (vii) max\_flanking\_pair\_distance = 10000 (the maximum distance  
16 (in bp) that can separate two markers in LD at the final selection step: (viii)  
17 max\_marker\_to\_gene\_distance = 6000 (the maximum distance (in bp) from a marker to the center  
18 of the gene of interest); (ix) marker\_independence\_threshold = 0.8 (the minimum LD for two  
19 markers to be considered in LD at the final selection step).

20

## 1 Identification of duplicated genes

2 We detected putative duplicated genes, presumably derived from WGD or gene duplication, using  
3 protein homology analysis integrated in the Phytozome (Goodstein et al. 2012) and SoyBase  
4 (Grant et al. 2010) databases. Protein homologs were identified using dual-affine Smith-Waterman  
5 alignments between the predicted translation product of the selected transcript (aka query gene)  
6 and all other predicted proteins in the soybean genome. We identified duplicated genes with 90%  
7 identity ( $ID \geq 90$ ), 90% coverage ( $CV \geq 90$ ), and 5% size difference ( $SD \leq 5$ ) threshold.

8

## 9 Code availability

10 The bioinformatics codes and scripts applied in this study for variant calling, population structure  
11 analysis, genetic diversity, tag SNP selection, imputation, GWAS, annotation and GCHs detection  
12 are publicly available at <https://figshare.com/account/home#/projects/56921>.

13

## 14 Data availability

15 The datasets produced in this study (GmHapMap nucleotide variants (complete dataset), reference  
16 panels (REF-I and REF-II), annotated GmHapMap nucleotide variants, GCHs for all 55K genes  
17 and LOF variants and genotypes) are publicly available at  
18 <https://figshare.com/account/home#/projects/56921>

19

## 1 Acknowledgments

2 This work was supported by the SoyaGen grant ([www.soyagen.ca](http://www.soyagen.ca)) awarded to F. Belzile and  
3 funded by Génome Québec, Genome Canada, the government of Canada, the Ministère de  
4 l'Économie, Science et Innovation du Québec, Semences Prograin Inc., Syngenta Canada Inc.,  
5 Sevita Genetics, Coop Fédérée, Grain Farmers of Ontario, Saskatchewan Pulse Growers, Manitoba  
6 Pulse & Soybean Growers, the Canadian Field Crop Research Alliance and Producteurs de grains  
7 du Québec. The work conducted by the US DOE Joint Genome Institute is supported by the Office  
8 of Science of the US DOE under Contract DE-AC02-05CH11231. We thank Dr. Brain Boyle to  
9 help for DNA library construction. We thank the Joint Genome Institute and collaborators for pre-  
10 publication access to the *Glycine max* W82 V2 genome sequence. We also thank Dr. Gary Stacy  
11 and Dr. Shakhawat Hossain for pre-publication access to the soybean transcriptome atlas.

## 12 Author contributions

13 DT and FB conceived the project. DT and JL contributed to programming and analysis of genomic  
14 data. DT carried out genetic diversity analysis, imputation, GCHs and identification of LOFs. BV  
15 and HN provided sequence data for American accessions. RA provided data for Brazilian  
16 accessions. DT, FB, EC, IR and LO provided data for Canadian accessions and also carried out  
17 NIRS analysis. AS and JS carried out the identification of gene duplication. DT and FB contributed  
18 to writing the manuscript.

## 19 Competing interests

20 The authors declare that they have no competing interests.

21

## 1 References

- 2 Browning BL, Browning SR. 2016. Genotype Imputation with Millions of Reference Samples.  
3 American Journal of Human Genetics. 98(1):116-126. doi:10.1016/j.ajhg.2015.11.020.
- 4 Bukowski R, Guo X, Lu Y, et al. 2018. Construction of the third-generation Zea mays haplotype  
5 map. GigaScience. 7(4):gix134. doi:10.1093/gigascience/gix134.
- 6 Caicedo, A.L. et al. 2007. Genome-wide patterns of nucleotide polymorphism in domesticated  
7 rice. PLoS Genet. 3, 1745–1756.
- 8 Cingolani, P., Platts, A., Wang, L.L., et al. 2012. A program for annotating and predicting the  
9 effects of single nucleotide polymorphisms, SnpEff: SNPs in the genome of Drosophila  
10 melanogaster strain w1118; iso-2; iso-3. Fly. 6(2):80-92. doi:10.4161/fly.19695.
- 11 Clark, R.M. et al. 2007. Common sequence polymorphisms shaping genetic diversity in  
12 Arabidopsis thaliana. Science 317, 338–342.
- 13 Danecek P, Auton A, Abecasis G, Albers CA, Banks E, et al. 2011. The Variant Call Format and  
14 VCFtools. Bioinformatics. doi:10.1093/bioinformatics/btr330.
- 15 Djanaguiraman M et al. 2018. Reproductive success of soybean (Glycine max L. Merrill) cultivars  
16 and exotic lines under high daytime temperature. Plant, Cell & Environment.  
17 <https://doi.org/10.1111/pce.13421>.
- 18 Fang C, Ma Y, Wu S, et al. 2017. Genome-wide association studies dissect the genetic networks  
19 underlying agronomical traits in soybean. Genome Biology. 18:161. doi:10.1186/s13059-017-  
20 1289-9.
- 21 Feldman MJ, Poirier BC, Lange BM. 2015. Misexpression of the Niemann-Pick disease type C1  
22 (NPC1)-like protein in Arabidopsis causes sphingolipid accumulation and reproductive defects.  
23 Planta. 242: 921. <https://doi.org/10.1007/s00425-015-2322-4>
- 24 Felsenstein J. 1985. Confidence limits on phylogenies: an approach using the bootstrap. Evolution.  
25 1985 Jul;39(4):783-791. doi: 10.1111/j.1558-5646.1985.tb00420.x.
- 26 Goettel W, Ramirez M, Upchurch RG, An YC. 2016. Identification and characterization of large  
27 DNA deletions affecting oil quality traits in soybean seeds through transcriptome sequencing  
28 analysis. Theoretical and Applied Genetics. 129:1577-1593. doi:10.1007/s00122-016-2725-z.
- 29 Goodstein, D.M., Shu, S., Howson, R., et al. 2012. Phytozome: a comparative platform for green  
30 plant genomics. Nucleic Acids Research. 40(Database issue):D1178-D1186.  
31 doi:10.1093/nar/gkr944.
- 32 Gore, M.A. et al. 2009. A first-generation haplotype map of maize. Science 326, 1115–1117.
- 33 Grant, D., Nelson, R.T., Cannon, S.B., and Shoemaker, R.C. 2010. SoyBase, the USDA-ARS  
34 soybean genetics and genomics database. Nucl. Acids Res. D843-D846. doi: 10.1093/nar/gkp798

- 1 Hao K, Chudin E, McElwee J, Schadt E. 2009. Accuracy of genome-wide imputation of untyped  
2 markers and impacts on statistical power for association studies. *BMC Genet.* 10:27.  
3 doi:10.1186/14712156-10-27PMID:19531258
- 4 Hwang, S., Kim, E., Lee, I. and Marcotte, E.M. 2015. Systematic comparison of variant calling  
5 pipelines using gold standard personal exome variants. *Scientific Reports.* 17875.  
6 doi:10.1038/srep17875
- 7 Hymowitz, T. & Harlan, J.R. 1983. Introduction of soybean to North America by Samuel Bowen  
8 in 1765. *Econ. Bot.* 37, 371–379.
- 9 Hymowitz, T. 1970. On the domestication of soybean. *Econ. Bot.* 24, 408–421.
- 10 Hyten, D.L. et al. 2006. Impacts of genetic bottlenecks on soybean genome diversity. *Proc. Natl.*  
11 *Acad. Sci. USA* 103, 16666–16671.
- 12 Jiang Y., Jiang Q., Hao C., Hou J., Wang L., Zhang H., et al. 2015. A yield-associated gene  
13 TaCWI, in wheat: its function, selection and evolution in global breeding revealed by haplotype  
14 analysis. *Theor. Appl. Genet.* 128 131–143. 10.1007/s00122-014-2417-5
- 15 Kumar S, Stecher G, Tamura K. 2016. MEGA7: Molecular Evolutionary Genetics Analysis  
16 Version 7.0 for Bigger Datasets. *Mol Biol Evol.* 33(7):1870-4. doi: 10.1093/molbev/msw054.
- 17 Langewisch T, Zhang H, Vincent R, Joshi T, Xu D, Bilyeu K. 2014. Major Soybean Maturity Gene  
18 Haplotypes Revealed by SNPviz Analysis of 72 Sequenced Soybean Genomes. *PLoS ONE* 9(4):  
19 e94150.
- 20 Lek, M. et al. 2016. Analysis of protein-coding genetic variation in 60,706 humans. *Nature* 536,  
21 285–291.
- 22 Li Y, Willer C, Sanna S. 2009. Genotype Imputation. *Annu. Rev. Genomics Hum. Genet.* 10:387–  
23 406. doi:10.1146/annurev.genom.9.081307.164242
- 24 Lipka, A.E., Tian, F., Wang, Q., Peiffer, J., Li, M., Bradbury, P.J., et al. 2012. GAPIT: genome  
25 association and prediction integrated tool. *Bioinformatics.* 28 (18): 2397–2399. doi:  
26 10.1093/bioinformatics/bts444
- 27 Lu S et al. 2017. Natural variation at the soybean J locus improves adaptation to the tropics and  
28 enhances yield. *Nature Genetics.* 49, 773–779.
- 29 Lu, J. et al. 2006. The accumulation of deleterious mutations in rice genomes: a hypothesis on the  
30 cost of domestication. *TIG* 22, 126–131.
- 31 MacArthur DG et al. 2012. A systematic survey of loss-of-function variants in human protein-  
32 coding genes. *Science* 335, 823–828.
- 33 Makino T, Rubin C-J, Carneiro M, Axelsson E, Andersson L, Webster MT. 2018. Elevated  
34 Proportions of Deleterious Genetic Variation in Domestic Animals and Plants. *Genome Biology*  
35 *and Evolution.* 10(1):276-290. doi:10.1093/gbe/evy004.

- 1 Maldonado dos Santos JV et al. 2016. Evaluation of genetic variation among Brazilian soybean  
2 cultivars through genome resequencing. *BMC Genomics* 17:110.
- 3 Maldonado dos Santos JV et al. 2016. Evaluation of genetic variation among Brazilian soybean  
4 cultivars through genome resequencing. *BMC Genomics* 17:110.
- 5 Marchini J, Howie B. 2010. Genotype imputation for genome-wide association studies. *Nature*  
6 *Reviews Genetics* volume 11, pages 499–511.
- 7 McNally, K.L. et al. 2009. Genome wide SNP variation reveals relationships among landraces and  
8 modern varieties of rice. *Proc. Natl. Acad. Sci. USA* 106, 12273–12278.
- 9 Purcell, S., Neale, B., Todd-Brown, K., Thomas, L., Ferreira, M.A., Bender, D., et al. 2007.  
10 PLINK: a tool set for whole genome association and population-based linkage analyses. *Am. J.*  
11 *Hum. Genet.* 81(3):559–75
- 12 Qiu, L.J. et al. 2013. A platform for soybean molecular breeding: the utilization of core collections  
13 for food security. *Plant Mol. Biol.* 83, 41–50.
- 14 Raj, A., Stephens, M., and Pritchard, J.K. 2014. fastSTRUCTURE: Variational Inference of  
15 Population Structure in Large SNP Data Sets. *Genetics*. 197:573-589
- 16 Ray DK, Mueller ND, West PC, Foley JA. 2013. Yield Trends Are Insufficient to Double Global  
17 Crop Production by 2050. *PLoS ONE* 8(6): e66428.doi:10.1371/journal.pone.0066428
- 18 Reinprecht Y, and Pauls KP. 2016. Microsomal Omega-3 Fatty Acid Desaturase Genes in Low  
19 Linolenic Acid Soybean Line RG10 and Validation of Major Linolenic Acid QTL. *Frontiers in*  
20 *Genetics*. 7: 38.
- 21 Roulin, A. et al. 2013. The fate of duplicated genes in a polyploid plant genome. *Plant J* 73, 143–  
22 153.
- 23 Saitou N and Nei M. 1987. The neighbor-joining method: a new method for reconstructing  
24 phylogenetic trees. *Molecular Biology and Evolution*. 4 (4): 406
- 25 Santana MH, Utsunomiya YT, Neves HH, Gomes RC, Garcia JF, Fukumasu H, et al. 2014.  
26 Genome-wide association analysis of feed intake and residual feed intake in Nellore cattle.  
27 *BMC Genet.* 15:21. doi:10.1186/1471-2156-15-21
- 28 Schmutz J, Cannon SB, Schlueter J, Ma J, Mitros T, Nelson W et al. 2010. Genome sequence of  
29 the palaeopolyploid soybean. *Nature*. 463(7278):178–183.
- 30 Segura V, Vilhjálmsson BJ, Platt A, Korte A, Seren Ü, Long Q et al. 2012. An efficient multi-  
31 locus mixed model approach for genome-wide association studies in structured populations. *Nat*  
32 *Genet* 44: 825–830.
- 33 Si L., Chen J., Huang X., Gong H., Luo J., Hou Q., et al. 2016. OsSPL13 controls grain size in  
34 cultivated rice. *Nat. Genet.* 48 447–456. 10.1038/ng.3518

- 1 Sonah H., O'Donoghue L., Cober E., Rajcan I., Belzile F. 2015. Identification of loci governing  
2 eight agronomic traits using a GBS–GWAS approach and validation by QTL mapping in soya  
3 bean. *Plant Biotech. J.* 3, 10. 10.1111/pbi.12249
- 4 Sonah, H., Bastien, M., Iquira, E., Tardivel, A., Legare, G., Boyle, B., et al. 2013. An Improved  
5 Genotyping by Sequencing (GBS) Approach Offering Increased Versatility and Efficiency of SNP  
6 Discovery and Genotyping. *PLoS ONE*. 8(1): e54603. doi: 10.1371/journal.pone.0054603 PMID:  
7 23372741
- 8 Song Q et al. 2017. Genetic Characterization of the Soybean Nested Association Mapping  
9 Population. *Plant Genome*. 2017 Jul;10(2). doi: 10.3835/plantgenome2016.10.0109.
- 10 Song Q, Hyten DL, Jia G, et al. 2013. Development and Evaluation of SoySNP50K, a High-  
11 Density Genotyping Array for Soybean. Zhang T, ed. *PLoS ONE*. 8(1):e54985.  
12 doi:10.1371/journal.pone.0054985.
- 13 Stephan W, Song YS, Langley CH. 2006. The Hitchhiking Effect on Linkage Disequilibrium  
14 Between Linked Neutral Loci. *Genetics*. 172(4):2647-2663. doi:10.1534/genetics.105.050179.
- 15 Stephens J. C., Schneider J. A., Tanguay D. A., Choi J., Acharya T., Stanley S. E., et al. 2001.  
16 Haplotype variation and linkage disequilibrium in 313 human genes. *Science* 293 489–493.  
17 10.1126/science.1059431
- 18 Tamura K, Nei M, Kumar S. 2004. Prospects for inferring very large phylogenies by using the  
19 neighbor-joining method. *Proc Natl Acad Sci U S A*. 101:11030–11035.
- 20 Tardivel et al. (Unpublished) A systematic gene-centric approach to define haplotypes and identify  
21 alleles based on dense SNP datasets.
- 22 Torkamaneh D, Laroche J, Rajcan I, Belzile F. 2018. Identification of candidate domestication-  
23 related genes with a systematic survey of loss-of-function mutations. *The Plant Journal*. doi:  
24 10.1111/tpj.14104.
- 25 Torkamaneh D, Laroche J, Tardivel A, O'Donoghue L, Cober E, Rajcan I, Belzile F. 2017.  
26 Comprehensive Description of Genome-Wide Nucleotide and Structural Variation in Short-  
27 Season Soybean. *Plant Biotechnology Journal*.
- 28 Torkamaneh, D., Laroche, J., Bastien, M., Abed, A., Belzile, F. 2017. Fast-GBS: a new pipeline  
29 for the efficient and highly accurate calling of SNPs from genotyping-by-sequencing data. *BMC*  
30 *Bioinformatics*. doi: 10.1186/s12859-016-1431-9
- 31 Tsubokura, Y., S., Watanabe, Z. Xia, H. Kanamori, H. Yamagata, A. Kaga, Y. Katayose, J. Abe  
32 M. Ishimoto, K. Harada. 2014. Natural variation in the genes responsible for maturity loci E1, E2,  
33 E3 and E4 in soybean. *Ann. Bot.* 113: 429–441.
- 34 Valliyodan, B., Qiu, D., Patil, G. et al. 2016. Landscape of genomic diversity and trait discovery  
35 in soybean. *Sci. Rep.* 6, 23598



- 1 Wang Y, Tan L, Fu Y, Zhu Z, Liu F, Sun C, et al. 2015 Molecular Evolution of the Sorghum  
2 Maturity Gene Ma3. PLoS ONE 10(5): e0124435.
- 3 Wang, Diane R. et al. 2018. An Imputation Platform to Enhance Integration of Rice Genetic  
4 Resources. Nature Communications. 9: 3519. PMC. Web. 6 Oct. 2018.
- 5 Watanabe S, Harada K, Abe J. 2012. Genetic and molecular bases of photoperiod responses of  
6 flowering in soybean. Breeding Science. 61(5):531-543. doi:10.1270/jsbbs.61.531.
- 7 Yan, G., Qiao, R., Zhang, F., Xin, W., Xiao, S., Huang, T., ... Huang, L. 2017. Imputation-Based  
8 Whole-Genome Sequence Association Study Rediscovered the Missing QTL for Lumbar Number  
9 in Sutai Pigs. Scientific Reports, 7, 615.
- 10 Yang N, Lu Y, Yang X, Huang J, Zhou Y, Ali F, et al. 2014. Genome Wide Association Studies  
11 Using a New Nonparametric Model Reveal the Genetic Architecture of 17 Agronomic Traits in an  
12 Enlarged Maize Association Panel. PLoS Genet 10(9): e1004573.
- 13 Yang Q., Li Z., Li W., Ku L., Wang C., Ye J., et al. 2013. CACTA-like transposable element in  
14 ZmCCT attenuated photoperiod sensitivity and accelerated the postdomestication spread of maize.  
15 Proc. Natl. Acad. Sci. U.S.A. 110 16969–16974. 10.1073/pnas.1310949110
- 16 Zhang C et al. 2018. PopLDdecay: a fast and effective tool for linkage disequilibrium decay  
17 analysis based on variant call format files. Bioinformatics. doi: 10.1093/bioinformatics/bty875.
- 18 Zhou Z, Jiang Y, Wang Z, Gou Z, Lyu J et al. 2015. Resequencing 302 wild and cultivated  
19 accessions identifies genes related to domestication and improvement in soybean. Nature  
20 Biotechnology. 33, 408–414. doi:10.1038/nbt.3096.
- 21
